# Supplementary material
Source: publisher figshare collection journal article supplement (https://karger.figshare.com/ndownloader/files/28986138)
Supplement: Supplementary file 1 [file 28986138]

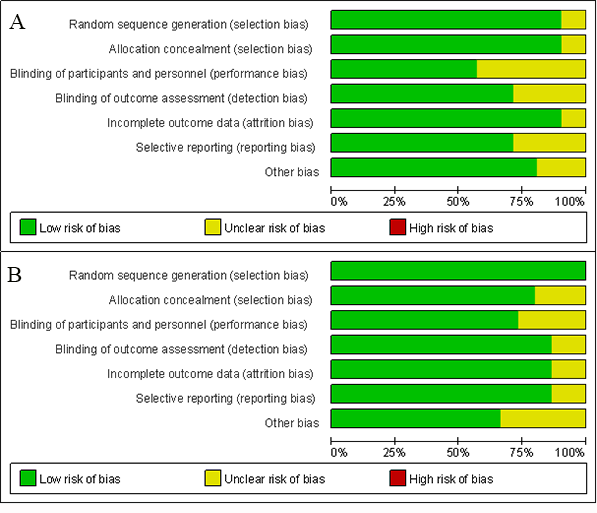


Supplementary figure 3. Risk of bias graph regarding association between circulating levels of 25-hydroxy (OH) vitamin D and risk of stroke (A), the effect of vitamin D supplementation on risk of stroke (B).
